# Supplementary material for: B Cells Control Mucosal-Associated Invariant T Cell Responses to Salmonella enterica Serovar Typhi Infection Through the CD85j HLA-G Receptor
Source: PubMed Central journal article supplement (PMC8517411; doi:10.3389/fimmu.2021.728685), 2021-10-01
Supplement: DataSheet_1.pdf [file DataSheet_1.pdf]

# Supplementary Information for

***B cells control mucosal-associated invariant T cell responses to Salmonella enterica serovar Typhi infection through the CD85j HLA-G receptor***

R. Salerno-Goncalves, T. Rezwan, D. Lou, H. Tettelin, and M.B. Sztein

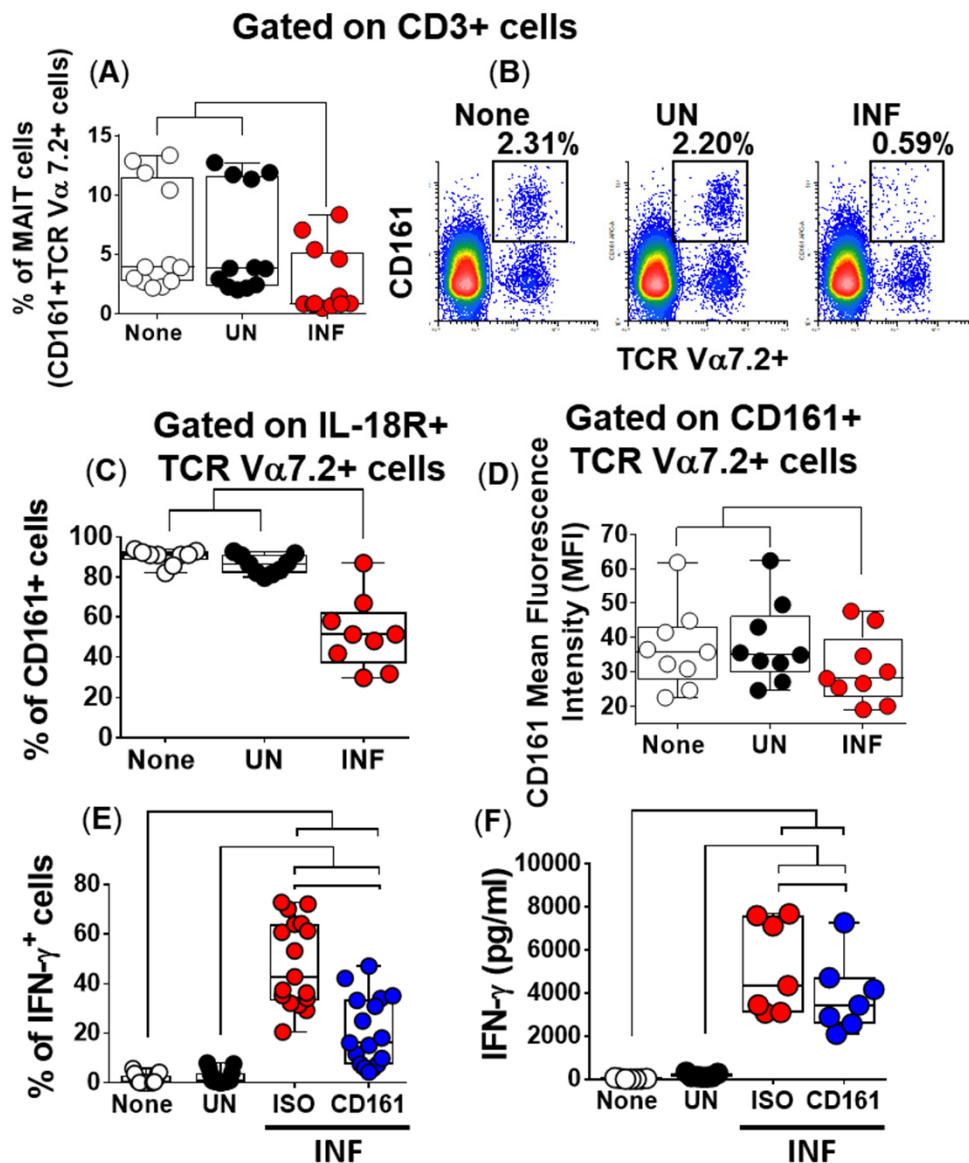

**Fig S1. CD161 regulation of MAIT cell function.** PBMC were exposed to either uninfected (UN) or *S. Typhi*-infected (INF) B-LCL cells. After 16-18 hours of co-culture, cells and supernatants were collected. **(A)** Percentage of MAIT cells alone (None) or after exposure to UN or INF B-LCLs were evaluated by flow cytometry; **(B)** cytograms of a representative experiment. **(C)** Percentage of CD161+ cells among IL-18R+ TCR V $\alpha$ 7.2+ MAIT cells. **(D)** Mean Fluorescence Intensity (MFI) of CD161 expressed on CD161+ TCR V $\alpha$ 7.2+ MAIT cells. **(E)** Percentage of MAIT cells secreting IFN- $\gamma$  when alone or after exposure to INF B-LCLs. MAIT cells were treated with neutralizing mAbs to CD161 antigens (CD161), or isotype control (ISO), and exposed to either uninfected (UN) or *S. Typhi*-infected (INF) B-LCL cells. Single lymphocytes were gated based on forward scatter height vs. forward scatter area. A dump channel was used to eliminate dead cells (ViViD+) as well as macrophages/monocytes (CD14+), B lymphocytes (CD19+) and targets (CD45+) from analysis. This was followed by additional gating on CD3, CD8, TCR V $\alpha$ 7.2 and CD161 or IL-18R to identify MAIT cells, and then on IFN- $\gamma$  to detect cytokine producing cells. These data represent 5 individual experiments. **(F)** IFN- $\gamma$  in the culture supernatants were measured by using the Meso Scale Discovery (MSD) platform. The data represent 2 individual experiments. Horizontal lines represent significant differences ( $P < 0.05$ ) between the indicated culture conditions. Bar graphs extend from the 25th to 75th percentiles; the line in the middle represents the median of the pooled data. The whiskers delineate the smallest to the largest value.

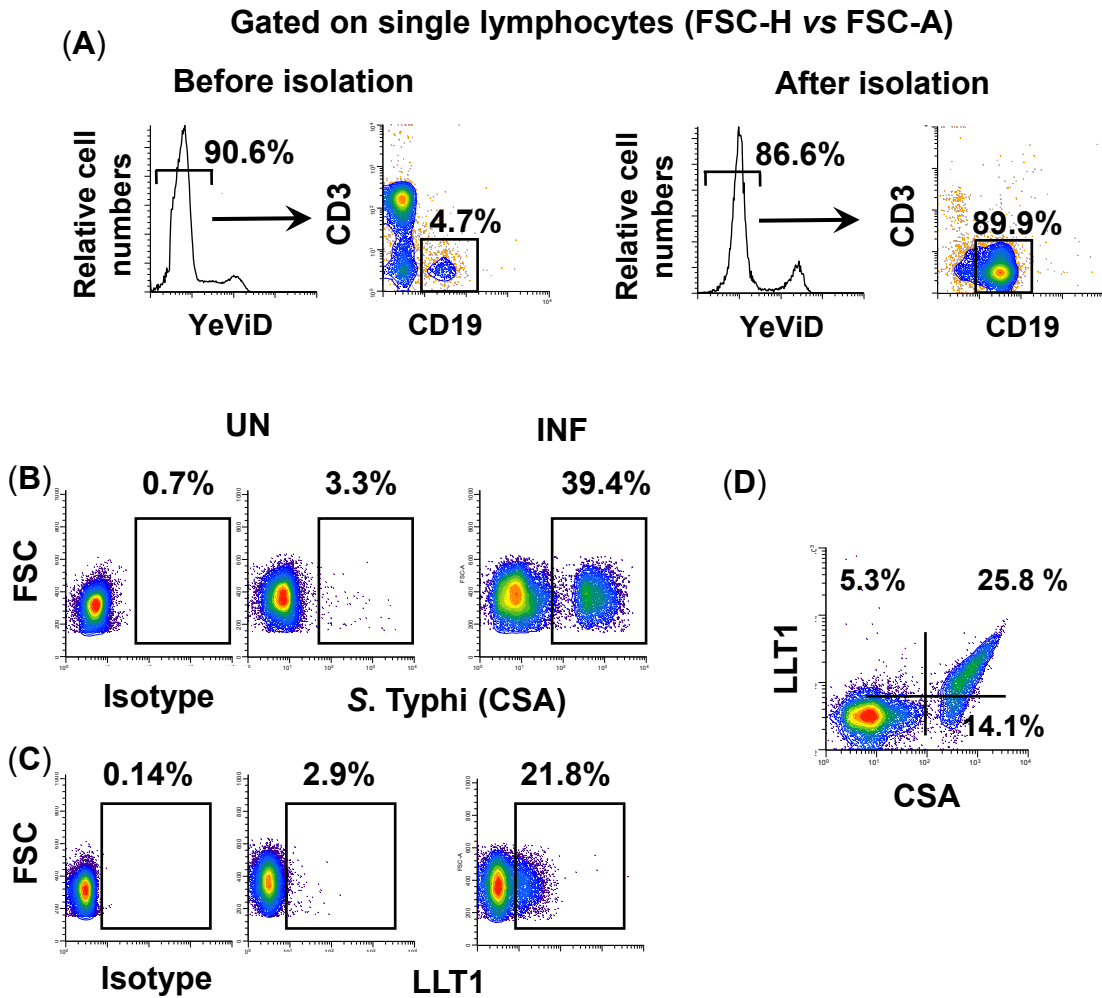

**Fig S2. Isolation of primary B cells and evaluation of CSA and LLT1 markers. (A)** Untouched primary human B cells were isolated from PBMC by negative selection using human B cell immunomagnetic beads. Isolated B cells were either left uninfected (UN) or were infected with *S. Typhi* (INF). After 16-18 hours of gentamicin treatment, cells were stained with anti-CSA **(B)** or LLT1 **(C)** Ab and analyzed by flow cytometry. **(D)** *S. Typhi* infection levels vs. LLT1 expression on B cells. These data represent 2 individual experiments with similar results.

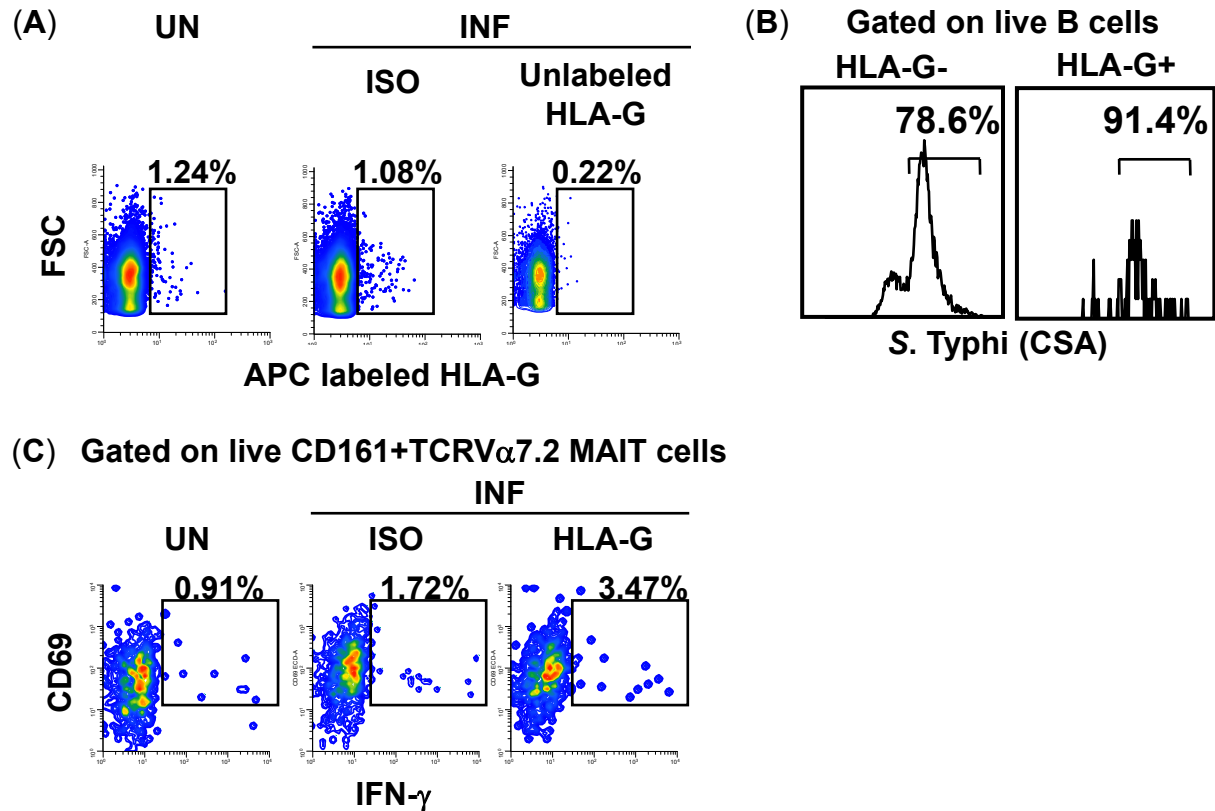

**Fig S3. HLA-G expression on primary B cells and MAIT cells responses.** Untouched primary human B cells were isolated from PBMC by negative selection using human B cell immunomagnetic beads. Isolated B cells were either left uninfected (**UN**) or infected with *S. Typhi* (**INF**). **(A)** After 16-18 hours of gentamicin treatment, cells treated with HLA-G neutralizing Ab (unlabeled HLA-G) or isotype (ISO) control (2.5  $\mu$ g/ml) for 1 hour, and then stained with APC labeled HLA-G Ab and analyzed by flow cytometry. **(B)** *S. Typhi* infection levels in live HLA-G- and HLA-G+ B cells. These data represent 2 individual experiments with similar results. **(C)** PBMC were exposed to autologous B cells either left UN or infected with *S. Typhi* and treated with Abs to HLA-G (HLA-G) or isotype (ISO) control (2.5  $\mu$ g/ml). After 16-18 hours of co-culture, cells were collected, and the levels of MAIT cells expressing IFN- $\gamma$  were evaluated by flow cytometry. Data are representative of two independent experiments with similar results.

**Table S1. Pearson's Correlations of IFN- $\gamma$  produced by MAIT cells and HLA-G, *Salmonella* antigen (CSA) and IL-10 expression on B cells**

| Phenotype*            |              | Number of Observations | Pearson's Corr. |                      |
|-----------------------|--------------|------------------------|-----------------|----------------------|
| MAIT cells            | B cells      |                        | r               | P value <sup>‡</sup> |
| Total IFN- $\gamma$ + | Total HLA-G+ | 36 <sup>†</sup>        | -0.344          | <b>0.020</b>         |
|                       | HLA-G+CSA-   | 36                     | -0.371          | <b>0.013</b>         |
|                       | HLA-G+CSA+   | 36                     | -0.299          | <b>0.038</b>         |
|                       | HLA-G-CSA+   | 36                     | 0.234           | 0.085                |
|                       | HLA-G+IL-10- | 36                     | -0.280          | <b>0.049</b>         |
|                       | HLA-G+IL-10+ | 36                     | -0.515          | <b>&lt;0.001</b>     |
|                       | HLA-G-IL-10+ | 36                     | -0.049          | 0.388                |
|                       | CSA+IL-10-   | 36                     | 0.177           | 0.152                |
|                       | CSA+IL-10+   | 36                     | -0.244          | 0.076                |
|                       | CSA-IL-10+   | 36                     | -0.150          | 0.191                |

\*Measured by Flow Cytometry

†Pooled data from 2 different experiments with 3 volunteers and 6 observations each

‡Bold fold represent significant correlations. The correlation coefficient "r" and "P" values are shown. P values of <0.05 were considered statistically significant

**Table S2. Pearson's Correlations of MAIT cell frequencies and HLA-G and *Salmonella* antigen (CSA) expression on B cells**

| Phenotype* |              | Number of Observations | Pearson's Corr. |                      |
|------------|--------------|------------------------|-----------------|----------------------|
| MAIT cells | B cells      |                        | r               | P value <sup>‡</sup> |
| Total      | Total HLA-G+ | 36 <sup>†</sup>        | 0.086           | 0.310                |
|            | Total CSA+   | 36                     | -0.529          | <b>&lt;0.001</b>     |
|            | HLA-G+CSA-   | 36                     | 0.429           | <b>0.005</b>         |
|            | HLA-G+CSA+   | 36                     | -0.319          | <b>0.029</b>         |
|            | HLA-G-CSA+   | 36                     | -0.505          | <b>&lt;0.001</b>     |

\*Measured by Flow Cytometry

†Pooled data from 2 different experiments with 3 volunteers and 6 observations each

‡Bold fold represent significant correlations. The correlation coefficient “r” and “P” values are shown. P values of <0.05 were

**Table S3. Expression of HLA-G and IL-10 on B-LCLs alone or in the presence of PBMC**

| Hours         | UN   |      |      |      | INF  |      |      |      | UN & PBMC |      |      |      | INF & PBMC |      |      |      |
|---------------|------|------|------|------|------|------|------|------|-----------|------|------|------|------------|------|------|------|
|               | 1    | 2    | 3    | 4    | 1    | 2    | 3    | 4    | 1         | 2    | 3    | 4    | 1          | 2    | 3    | 4    |
| HLA-G+IL-10-* |      |      |      |      |      |      |      |      |           |      |      |      |            |      |      |      |
| 3             | 4.15 | 3.12 | 3.12 | 2.67 | 2.72 | 4.39 | 4.06 | 5.04 | 8.74      | 13.1 | 10.8 | 12.8 | 6.06       | 15.2 | 13.7 | 19.1 |
| 6             | 3.69 | 3.99 | 1.52 | 4.14 | 7.16 | 5.02 | 4.22 | 5.3  | 11.4      | 10.7 | 7.67 | 17.4 | 16.2       | 30.9 | 29.3 | 27   |
| 16            | 4.81 |      | 6.6  | 6.04 | 4.81 |      | 9.3  | 10.1 | 5.66      | 26.9 | 28.1 |      | 4.94       | 31.2 | 29.9 |      |
| HLA-G+IL-10+  |      |      |      |      |      |      |      |      |           |      |      |      |            |      |      |      |
| 3             | 0.04 | 0.05 | 0.1  | 0.01 | 0.03 | 0.22 | 0.03 | 0.03 | 0.19      | 0.62 | 0.97 | 0.75 | 0.18       | 1.31 | 2.31 | 1.07 |
| 6             | 0.01 | 0.11 | 0.11 | 0.02 | 0.01 | 0.06 | 0.07 | 0.01 | 1.15      | 0.95 | 1.75 | 0.98 | 0.56       | 2.55 | 2.82 | 5.04 |
| 16            | 0.04 |      | 0.1  | 0.24 | 0.04 |      | 0.2  | 0.1  | 0.2       | 1.45 | 1.36 |      | 0          | 2.5  | 0.51 |      |

\*Measured by Flow Cytometry; results from cells obtained from PBMC of 4 different individuals (i.e., 1, 2, 3, and 4)  
 UN, uninfected, INF, S. Typhi-infected B-LCL cells

Gated on single lymphocytes (FSC-H vs FSC-A)

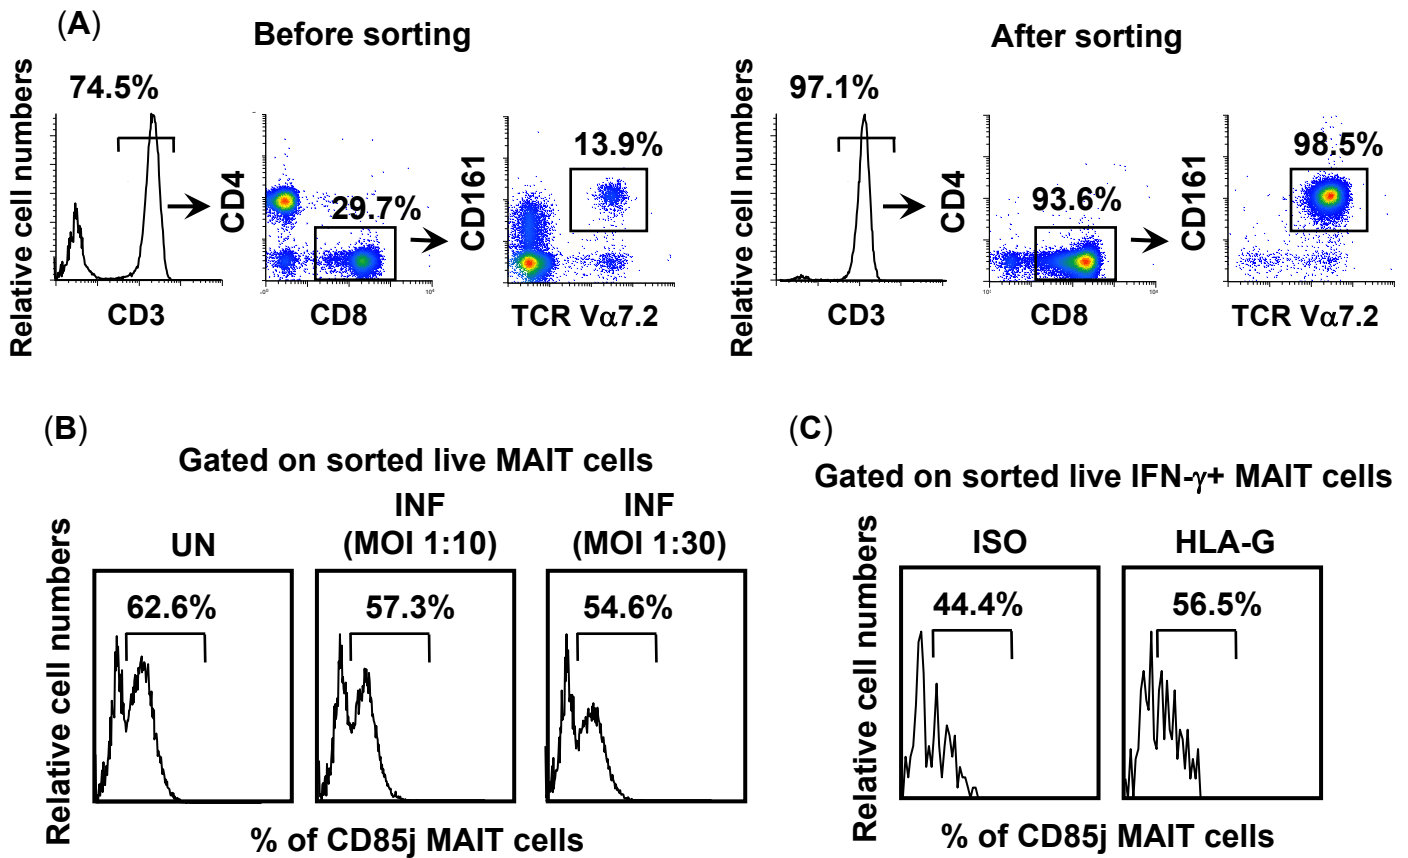

**Fig S4. Sorting of MAIT cells and expression of the CD85j HLA-G inhibitory receptor after *S. Typhi* exposure.** (A) MAIT cells (CD3+CD4-CD14-CD19-IL-18R+ TCR Va7.2+) were sorted from PBMC. Sorted MAIT cells were exposed to either UN or INF B-LCLs treated with Abs to HLA-G (HLA-G) or isotype (ISO) control (2.5  $\mu$ g/ml). After 16-18 hours of co-culture, cells were collected, and the levels of MAIT cells (CD3+CD4-CD14-CD19-CD161+TCRV $\alpha$ 7.2+) expressing CD85j and IFN- $\gamma$  were evaluated by flow cytometry. Representative experiment showing CD85j expression on sorted MAIT cells. Levels of MAIT cells expressing (B) CD85j only or (C) co-expressing IFN- $\gamma$ .



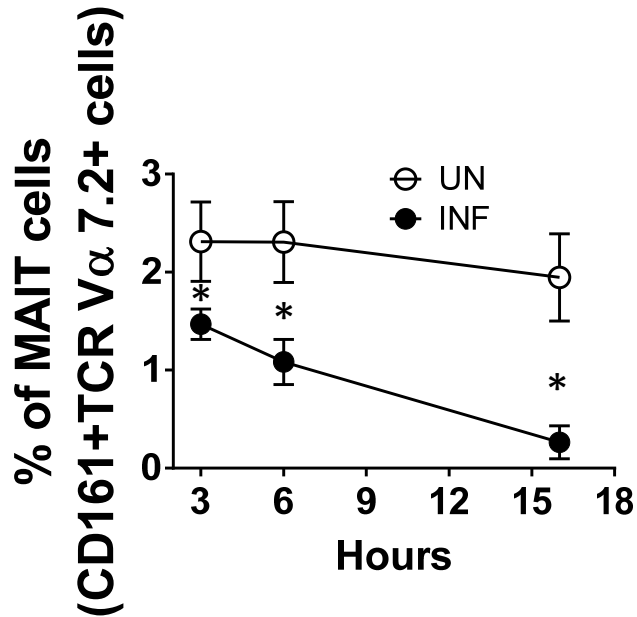

**Fig S5. Kinetics of MAIT cell frequencies after exposure to *S. Typhi*-infected B-LCL.** PBMC cells were exposed to either uninfected (UN) or *S. Typhi*-infected (INF) B-LCL cells. After 3, 6, and 16 hours of co-culture, cells were collected, and the percentages of MAIT cells were evaluate by flow cytometry. Error bars represent the SE of three biological replicates. Student's t-test was performed to compare MAIT cell levels after exposure to UN and INF B-LCL. \*, represent significant differences ( $P < 0.05$ ) between the uninfected (○) and infected B-LCLs (●) at the same timepoint.

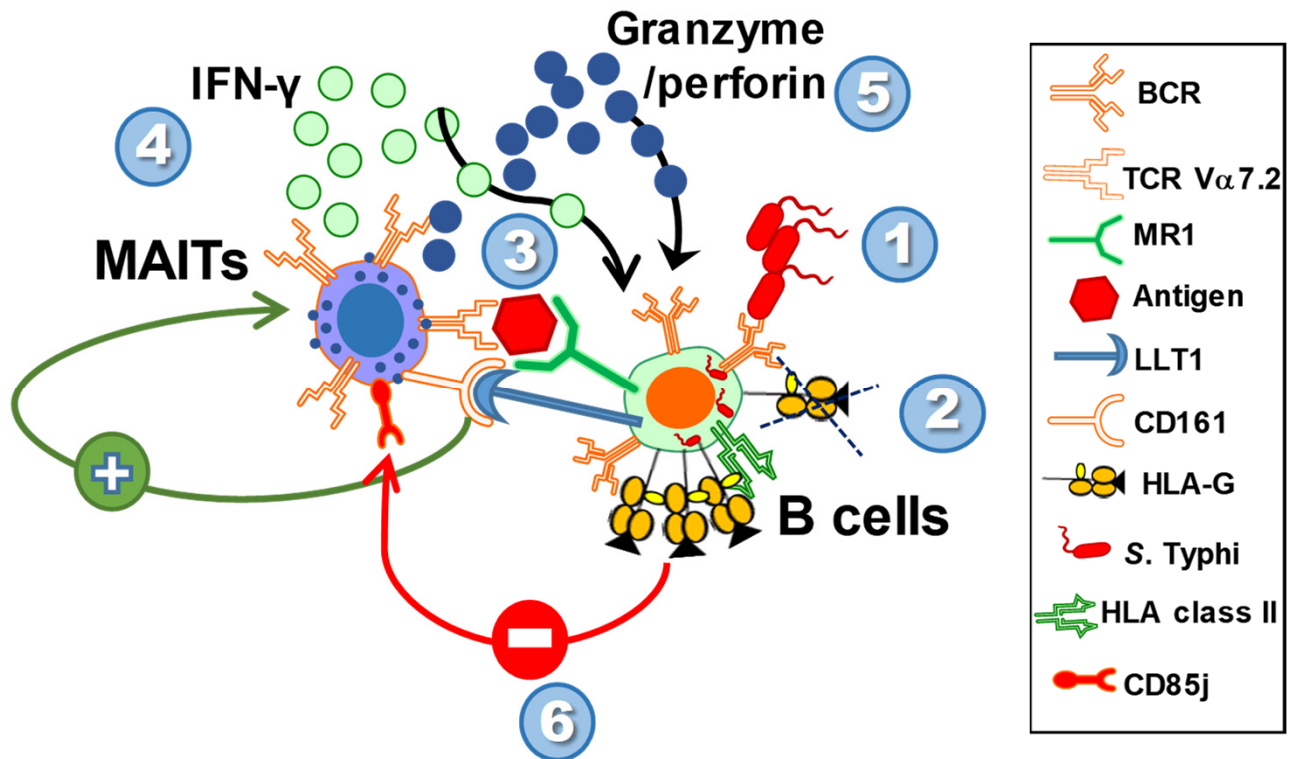

**Fig S6. Hypothetical feedback mechanism(s) of HLA-G expressing B cells in the regulation of MAIT cell function.** Early during infection, (1) *S. Typhi* are endocytosed by B cells, (2) triggering the downregulation of HLA-G on their surface. (3) Infected B cells present *S. Typhi* antigens together with MR1 molecules on the cell membrane to the TCR V $\alpha$ 7.2 on MAIT cells. After interacting with *S. Typhi*-infected B cells, activated MAIT cells secrete cytokines, including IFN- $\gamma$  (4), and kill infected B-cells, likely through the (5) production of perforins and granzymes. As infection progresses, B cells respond to the increased IFN- $\gamma$  secretion by (6) up-regulating the expression HLA-G (e.g., HLA-G1 & HLA-G5), to limit the production of IFN- $\gamma$  by MAIT cells through interaction with inhibitory HLA-G receptor CD85j on MAIT cells, thereby controlling inflammation to avoid dysregulated host responses. These inhibitory signals are likely to result in apoptosis of MAIT cells.
